1 Classification: Biological Sciences, Ecology

2

3 **Parental environmental effects are common and strong, but unpredictable, in**

4 *Arabidopsis thaliana*

5

6 Vít Latzel<sup>a,b,1</sup>, Markus Fischer<sup>b</sup>, Maartje Groot<sup>c</sup>, Ruben Gutzat<sup>d</sup>, Christian Lampei<sup>e,f</sup>, Joop  
7 Ouborg<sup>c</sup>, Madalin Parepa<sup>g</sup>, Karl Schmid<sup>e</sup>, Philippine Vergeer<sup>c,h</sup>, Yuanye Zhang<sup>b,i</sup>, Oliver  
8 Bossdorf<sup>b,g,1</sup>

9

10 <sup>a</sup> Institute of Botany of the CAS, Zámek 1, 252 43 Průhonice, Czech Republic

11 <sup>b</sup> Institute of Plant Sciences, University of Bern, Altenbergrain 21, 3013 Bern, Switzerland

12 <sup>c</sup> Department of Experimental Plant Ecology, Radboud University, PO Box 9100, 6500 GL,  
13 Nijmegen, The Netherlands

14 <sup>d</sup> Gregor Mendel Institute of Molecular Plant Biology, Dr. Bohr-Gasse 3, 1030 Vienna,  
15 Austria

16 <sup>e</sup> Institute of Plant Breeding, Seed Science and Population Genetics, University of  
17 Hohenheim, 70599 Stuttgart, Germany

18 <sup>f</sup> Institute of Biology, University of Marburg, Karl-von-Frisch-Straße 8 35032 Marburg,  
19 Germany

20 <sup>g</sup> Plant Evolutionary Ecology, University of Tübingen, Auf der Morgenstelle 5, 72076  
21 Tübingen, Germany

22 <sup>h</sup> Plant Ecology and Nature Conservation group, Wageningen University, P.O.Box 47, 6700  
23 AA, Wageningen, the Netherlands

24 <sup>i</sup> Key Laboratory of the Ministry of Education for Coastal and Wetland Ecosystems, Collegen  
25 of the Environment and Ecology, Xiamen University, Xiamen, Fujian 361102, China

26

27 <sup>1</sup>To whom correspondence should be addressed: [vit.latzel@ibot.cas.cz](mailto:vit.latzel@ibot.cas.cz), [oliver.bossdorf@uni-](mailto:oliver.bossdorf@uni-tuebingen.de)  
28 [tuebingen.de](mailto:oliver.bossdorf@uni-tuebingen.de)

29

30 Keywords: environmental stress, maternal effects, natural variation, phenotypic plasticity,  
31 transgenerational effects

32

## 33 **Abstract**

34 The phenotypes of plants can be influenced by the environmental conditions experienced by  
35 their parents. In some cases, such parental effects have been found to be adaptive, which has  
36 led to much speculation about their ecological and evolutionary significance. However, there  
37 is still much uncertainty about how common and how predictable parental environmental  
38 effects really are. We carried out a comprehensive test for parental effects of different  
39 environmental stresses in the model plant *Arabidopsis thaliana*. We subjected plants of three  
40 *Arabidopsis* genotypes to a broad range of biotic or abiotic stresses, or combinations thereof,  
41 and compared their offspring phenotypes in a common environment. The majority of  
42 environmental stresses (16 out of 24 stress treatments) caused significant parental effects, in  
43 particular on plant biomass and reproduction, with positive or negative effects ranging  
44 from -35% to +38% changes in offspring fitness. The expression of parental effects was  
45 strongly genotype-dependent, with some effects only present in some genotypes but absent,  
46 or even in the opposite direction, in others. Parental effects of multiple environmental stresses  
47 were often non-additive, and their effects can thus not be predicted from what we know about  
48 the effects of individual stresses. Intriguingly, the direction and magnitude of parental effects  
49 were unrelated to the direct effects on the parents: some stresses did not affect the parents but  
50 caused substantial effects on offspring, while for others the situation was reversed. In  
51 summary, parental environmental effects are common and often strong in *A. thaliana*, but  
52 they are genotype-dependent and difficult to predict.

53

## 54 **Significance**

55 Stress experienced by plants can alter the phenotypes of their offspring. To understand the  
56 ecological and evolutionary significance of such parental effects, we must know how  
57 common and how predictable they are. In a large experiment with *Arabidopsis thaliana*, we  
58 show that the majority of 24 environmental stresses cause significant, and often strong,  
59 positive or negative parental effects. However, we also find that parental effects are genotype-  
60 specific and unrelated to the direct effect of individual stresses, and that multiple stresses  
61 often act in non-additive ways across generations. Thus, parental effects appear to be  
62 common and strong, but difficult to predict. Our findings have important implications for the  
63 study of plant responses to environmental change, and the design of stress experiments.

64

## 65 **Introduction**

66 Phenotypic variation is at the heart of ecology and evolution. The variation in phenotype that  
67 we observe among individuals of the same species either reflects underlying genetic  
68 differences, and thus the evolutionary potential of a species, or it results from plastic  
69 responses to the environment, and could thus be related to a species' environmental tolerance.  
70 A third source of phenotypic variation are parental effects, where the environmental  
71 conditions of parents affect the phenotypes of their progeny (1, 2, 3). Parental effects are  
72 somewhat peculiar in that they can generate patterns of resemblance among relatives that  
73 would usually be considered evidence for underlying genetic variation, while in fact they  
74 represent special cases of phenotypic plasticity that extend across generations. The biological  
75 mechanisms that cause parental effects include simple nutritional effects such as differential  
76 seed provisioning, but also physiological effects mediated by hormones, toxins or other  
77 cytosol components, or even epigenetic mechanisms where differential DNA methylation or  
78 chromatin changes are passed on to offspring (2, 4, 5).

79 Previous studies showed that parental effects can be ecologically important (e.g. 6, 7, 8)  
80 and also influence evolution (e.g. 9; 10, 11, 12, 13). In particular the demonstration that some  
81 parental effects are adaptive, with offspring thriving better in parental than non-parental  
82 environments (e.g. 6, 14, 15, 16, 17, 18), triggered a debate to what extent parental effects  
83 may be evolved mechanisms and a means of rapid adaptation to environmental change (e.g.  
84 2, 12, 19, 20, 21, 22). However, despite great current interest in parental effects, many  
85 important questions remain unresolved.

86 One of the key challenges in the study of parental effects is to understand how general  
87 and how strong they really are. An increasing number of studies showed that parental effects  
88 can be substantial, and that they can both increase or decrease offspring fitness (e.g. 6, 8, 23,  
89 24, 25, 26, 14, 18, 27, 28, 29), but many of these studies tested a single environmental factor  
90 on a single species, sometimes using only a single genotype (but see e.g. 17, 28, 30, 31, 32,  
91 33). As a consequence, we still do not have a good idea of how widespread parental effects  
92 are across different environmental factors, and how consistent they are across species and  
93 genotypes. Given that non-successful tests for parental effects are more likely to end up in  
94 file drawers, researchers sceptical of parental effects might suspect that studies as the ones  
95 cited above merely represent 'freak' cases that cannot be generalized. Ultimately, the debate  
96 can only be settled through comprehensive experiments that test for parental effects across  
97 multiple species, genotypes and/or environmental factors.

98 Another fundamental question about parental effects is how predictable they are. For  
99 instance, is the magnitude and direction of a parental effect related to (and thus predictable  
100 from) the direct effect of an environmental stress on the parental generation? Intuitively, one  
101 should expect that environmental factors with stronger effects on parents are more likely to  
102 also affect their offspring, and that environmental factors with little or no effects on the  
103 parents should neither affect their offspring. But is this really true? We are not aware of any  
104 published study that has tested these simple but important assumptions.

105 Environmental change usually involves simultaneous changes in multiple  
106 environmental factors (34, 35, 36, 37). Still, most previous studies on parental effects worked  
107 with single environmental factors. We know, however, that the direct effects of multifactorial  
108 environmental changes are often non-additive (e.g. 36, 38, 39, 40, 41, 42). It thus appears  
109 critical to also compare the transgenerational effects of single versus multiple environmental  
110 changes, to test the predictability of complex parental effects and assess the meaningfulness  
111 of previous simplified studies. However, so far only few studies (e.g. 17, 23, 24, 43, 44)  
112 tested for the parental effects of multiple simultaneous environmental changes.

113 Here we used the model species *Arabidopsis thaliana* to thoroughly assess the  
114 generality and predictability of parental effects. We subjected multiple genotypes of *A.*  
115 *thaliana* to a broad range of biotic or abiotic environmental stresses, or combinations of  
116 these, altogether 24 different stress treatments, and then assessed phenotypic variation in the  
117 offspring of these plants. Our experimental set-up allowed us to address the following  
118 questions: (1) How common and how consistent are parental effects across different  
119 environmental stresses and plant genotypes? (2) Can the direction and magnitude of parental  
120 effects be predicted from the direct effects of environmental stresses on the parental  
121 generation? (3) Are the parental effects of multiple simultaneous environmental stresses  
122 additive or non-additive?

123

## 124 **Results and Discussion**

### 125 *Generality and consistency of parental effects*

126 Many of the studied abiotic or biotic environmental stresses, or their combinations, caused  
127 significant parental effects in our experiment. The magnitude and direction of these effects  
128 strongly depended on the treatment, plant genotype, and the measured plant trait (Table 1).

129 The strongest parental effects were on plant biomass and fruit production, where several  
130 stresses experienced by mother plants increased or decreased the performance of their  
131 offspring by 30-40% (Figure 1). For instance, exposure of mother plants to cold, mild heat or

132 shading transgenerationally increased biomass and reproduction by 20-35%, whereas intense  
133 heat, or salt in combination with drought, had the opposite effect and decreased both biomass  
134 and fruit production by similar amounts (Figure 1). The magnitudes of these effect sizes are  
135 well within the range of what previous studies have reported for parental effects in *A.*  
136 *thaliana* and other species (e.g. 6, 15, 16, 18, 26, 30, 45). Overall, 7 out of the 12 studied  
137 stresses had significant transgenerational effects on plant biomass, and 5 out of 12 on plant  
138 reproduction (Table 1). Thus, parental effects appear to be common in *A. thaliana*, and  
139 elicited by a broad range of environmental stresses – with likely consequences for ecological  
140 interactions and evolutionary trajectories (9, 10, 46).

141 Compared to plant biomass and reproduction, the growth rate and flowering time of  
142 plants were much less subject to parental effects, with only few percent changes across  
143 generations (Figure 1), and few individual stresses with significant transgenerational effects  
144 (Table 1). Clearly, some plant traits are much less prone to parental effects than others,  
145 possibly because they are under tighter developmental control. A good example is flowering  
146 time, which is strongly differentiated among geographic origins (significant ecotype effects in  
147 Table 1; see also 47), but it is hardly plastic across generations.

148 The three *Arabidopsis* ecotypes included in our study often differed in the degree and  
149 magnitude of transgenerational effects (Figure 1; significant ecotype interactions in Table 1).  
150 Sometimes the effects were even in opposite directions, resulting in non- or hardly significant  
151 main effects of an environmental stress across ecotypes. For instance, drought and salt stress  
152 had negative transgenerational effects (i.e. lower performance of offspring compared to the  
153 offspring of control plants) on the *Col* ecotype, but positive effects on *Tsu*, and none at all on  
154 *Sha* (Figure 1). Our results thus demonstrate substantial genetic variation for parental effects  
155 among *Arabidopsis* ecotypes, which supports previous studies with *Arabidopsis* and other  
156 plant species (e.g. 17, 29, 30, 48, 49, 50, 51; 52) that also found genotype-specificity of  
157 parental effects. Compared to previous studies, our experiment included a much broader  
158 range of environmental stresses, and it thus demonstrates that G x E effects are very common  
159 across generations, just as they are for within-generation plasticity (53, 54).

160 In summary, we find that parental effects are common and strong, but genotype-  
161 specific, in *Arabidopsis thaliana*. Because of this genotype-specificity, and their effects  
162 particularly on fitness-related traits, we should expect parental effects to influence selection  
163 and evolution of the species.

164

165 *Effects on parental versus offspring generation*

166 Having demonstrated parental effects of a broad range of environmental stresses, we next  
167 asked if the direction and magnitude of these cross-generation effects was related to the  
168 within-generation effects of the different stresses. Intuitively, we expected that negative  
169 transgenerational effects would be caused by environmental stresses that also have negative  
170 effects on the same trait in mother plants, and vice versa. We found that this was the case for  
171 some environmental stresses. For instance, the combination of short intense heat with  
172 continuing mild heat significantly decreased the biomass of both mother plants and their  
173 offspring (Figure 2). However, there were also cases where within- and across-generation  
174 effects were in opposite directions. For instance, high light intensity increased the growth of  
175 mother plants, but it decreased offspring biomass, and for mild heat it was vice versa (Figure  
176 2). There were also cases where stress treatments affected mother plants but not the offspring,  
177 e.g. for salt addition or intense heat, which strongly decreased the biomass of parents but had  
178 no effects across generations (Figure 2). Most interestingly, we observed also cases where the  
179 direct, within-generation effects of stresses were almost zero, but there were significant  
180 transgenerational effects. Examples are cold and drought, which did not at all affect the  
181 mother plants in our experiment, but they both strongly increased offspring biomass (Figure  
182 2). Environmental stresses with strong direct impacts but no parental effects have been  
183 reported previously (e.g. 17, 25), but we are not aware of any previous studies that have  
184 shown the opposite. Altogether, because of the diversity of within- versus across-generation  
185 responses, there was no relationship between the stress responses of mothers and offspring in  
186 our experiment ( $R^2=0.038$ ,  $P = 0.358$ ). While a discussion of the biological mechanisms  
187 underlying these diverse results is beyond the scope of this paper, an important take-home  
188 message is that the direction and magnitude of parental effects cannot be predicted from the  
189 parental responses to an environmental stress, and that sometimes seemingly ineffective  
190 environmental changes may nevertheless cause strong parental effects.

191

### 192 *Parental effects of multiple simultaneous environmental stresses*

193 Environmental change is usually multifactorial (36, 37). It is therefore important to  
194 understand interactions between multiple drivers of environmental change, and their potential  
195 non-additive effects on organisms (e.g. 35, 38, 39, 41, 42). Our experiment allowed us to  
196 address these questions for parental effects of a broad range of environmental stresses on *A.*  
197 *thaliana*. We found that for 8 out of the 12 combinations of environmental stresses there were  
198 significant statistical interactions in their effects on plant biomass and/or fruit number (Table  
199 1), indicating non-additivity of stresses when occurring in combination. For instance, high

200 light intensity and pathogen infection caused negative parental effects on plant biomass when  
201 tested individually, but in combination they increased the biomass of offspring plants (Figure  
202 1C). Positive parental effects of cold and shading turned into a negative effect when the two  
203 stresses were combined, and while drought and salt caused positive or neutral parental  
204 effects, their combination caused the strongest negative parental effect on plant biomass  
205 observed in our experiment (Figure 1C). In addition to the general interactions between  
206 environmental stresses, we also found several significant three-way interactions between two  
207 stresses and plant genotype (Table 1), i.e. the non-additivity of multiple stresses depended to  
208 some degree on the plant genotype. Our results corroborate the findings of the few previous  
209 studies that tested for transgenerational effects of multiple stresses (17, 24, 43) and that found  
210 similar non-additive effects. They clearly show that the non-additivity – or context-  
211 dependency – of multiple environmental stresses is another challenge for predicting parental  
212 effects, particularly under realistic conditions.

213

### 214 *Conclusions*

215 In summary, our study demonstrates that parental effects strongly influence the growth and  
216 reproduction of *Arabidopsis thaliana*, and that many different environmental stresses can  
217 cause such parental effects. This is an important result also because we urgently need to  
218 understand the mechanisms by which plants respond to global environmental changes, and  
219 besides phenotypic plasticity (55, 56, 57) and longer-term adaptation (e.g. 58), parental  
220 effects might be another, somewhat intermediate, facet of plant responses. We also found that  
221 parental effects were strongly genotype-dependent, that effects of multiple stresses were often  
222 non-additive, and that there was no relationship between the within- and across-generation  
223 effects of environmental stresses. Thus, parental effects in *A. thaliana* are complex and  
224 difficult to predict, and we should be cautious with generalizing from simple studies with  
225 single plant genotypes and/or only few individual environmental stresses. From all we know  
226 about the ubiquity of G x E interactions, it seems likely that the situation is similar also for  
227 parental effects in other plant species. A thorough understanding of parental effects in plants  
228 will therefore be possible only with large experiments that include multiple plant genotypes  
229 and multiple, interacting environmental drivers.

230

### 231 **Methods**

#### 232 *Plant material*

233 *Arabidopsis thaliana* is an annual species from open or disturbed habitats of the northern  
234 hemisphere. Because of its small genome size, predominant selfing and rapid life-cycle the  
235 species is a popular model species in plant biology as well as ecological and evolutionary  
236 genetics and genomics (59, 60). In our study we worked with three ecologically and  
237 geographically distinct genotypes of *A. thaliana*, the common laboratory strain *Col-0*  
238 (Versailles Center ID 168AV), the *Sha* genotype (VC ID 236AV) originating from Tajikistan  
239 and the *Tsu-0* genotype (VC ID 91AV) from Japan. All three genotypes are frequently used in  
240 genetics and plant biology, and have served as parents for populations of recombinant inbred  
241 lines. The same seed batch was used in all four experimental locations (see below).

242

### 243 *Parental generation*

244 We subjected the plants to 12 different individual biotic and abiotic parental stress treatments,  
245 plus 12 pairwise combinations of these stresses, resulting in a total of 24 different stress  
246 treatments. For logistic reasons, the 24 treatments were distributed across four different labs  
247 (henceforth referred to as “locations”) in Bern, Hohenheim, Nijmegen and Vienna. In Bern,  
248 we tested the effects of light stress, heavy metal, pathogens, and all pairwise combinations of  
249 these. In Hohenheim, we tested the effects of cold treatment, shading and leaf removal  
250 (simulated grazing), and their combinations. In Nijmegen we tested the effects of drought,  
251 salt stress and jasmonic acid (simulation of herbivore attack), and their combinations, and in  
252 Vienna we tested two different kinds of heat stress, as well as the effects of low nutrients, and  
253 their pairwise combinations (see next section for more details on the treatments).

254 At each location, we grew the plants in temperature-controlled growth chambers under  
255 the same standardized temperature and daylength conditions (16/8h light/dark, 21°C/16°C),  
256 and we further minimized location differences by growing plants in the same pots (7 x 7 cm)  
257 and substrate (Einheitserde ED 63T) everywhere. We stratified seeds on wet filter paper at  
258 4°C for three days and transplanted seedlings to individual pots. All plants were bottom-  
259 watered twice a week throughout the study. Sixteen days after sowing, we started the parental  
260 stress treatments, with six treatments (see above) plus a control treatment in each location,  
261 and seven replicates per treatment and genotype, i.e. 147 plants per location and 588 plants  
262 overall. Where possible, treatments were terminated when the plants started to bolt.

263 To estimate the growth rates of plants under different experimental conditions, we  
264 measured the rosette diameter of each plant at 16, 20, 24, 28 and 32 days after sowing, fitted  
265 a power function to each plant’s data, and used the parameter *b* as a measure of



266 growth rate. Throughout the experiment, we continuously monitored plant phenology and  
267 recorded the date of first flowering (= first petals visible) of each plant. The plants were  
268 harvested sequentially, each at the same developmental stage when approximately one third  
269 of the siliques had reached maturity. We harvested each plant aboveground, counted its fruit  
270 number, and placed it in a paper bag for drying and after-ripening at room temperatures. After  
271 14 days we collected the seeds from the paper bags, dried the remaining biomass at 70°C for  
272 24 hours and weighed it. We pooled the seeds of all replicate plants per genotype and parental  
273 treatment and used these to establish the offspring generation (see below).

274

#### 275 *Parental treatments*

276 We experimentally subjected the parental plants to 12 different environmental treatments: (1)  
277 **Light stress** was imposed by increasing light levels from approximately 250  $\mu\text{mol m}^{-2} \text{s}^{-1}$  in  
278 the control environment to 450  $\mu\text{mol m}^{-2} \text{s}^{-1}$  in the treated plants. (2) **Heavy metal stress** was  
279 created by adding 5 ml of a 8 mMol solution of  $\text{CuSO}_4$  to each treated pot every second day,  
280 with the last addition at day 28 after sowing. (3) For **pathogen infection** we sprayed the  
281 plants four times (starting at day 16 after sowing, and then every third day) with a water  
282 solution containing  $8 \times 10^8$  bacteria of *Pseudomonas syringae* pv. *tomato* DC3000 per ml.  
283 The *P. syringae* DC3000 strain is strongly virulent and causes disease symptoms in  
284 *A.thaliana*. (4) **Cold stress** was imposed by regularly subjecting plants to 16 h of 4° C  
285 temperature during one week (16 h cold followed by 8 h at 21° C; a total of 112 h of cold). To  
286 keep plants at long-day conditions, the 16 h cold were divided into 8 h at light and 8 h at dark  
287 conditions. (5) **Shading** was created by growing plants under a shading filter foil (122 Fern  
288 Green; Lee Filters, Andover, UK) that reduced light by 50% and lowered the red:far red ratio  
289 to 0.2. The plants were kept shaded until the control plants began to flower. (6) **Leaf**  
290 **removal** was applied by cutting off all cotyledons, which at this time represented 50% of the  
291 leaf area, at day 16. 20 days later we repeated the treatment and again cut 50% of the leaf  
292 area of each plant. (7) **Drought stress** was created by not watering the treated plants unless  
293 they showed signs of wilting, whereas all other plants were watered regularly. (8) To create  
294 **salt stress**, we added a 4g/L NaCl solution at day 16 and after that treated plants twice a week  
295 with a 8 g/L NaCl solution until day 30. (9) **Jasmonic acid** was applied by spraying treated  
296 plants with a 0.5 mM jasmonic acid solution (Cipollini et al. 2002) and control plants with a  
297 mock treatment of 0.5% ethanol every second day starting at day 16 days after sowing. (10)  
298 **Low nutrient stress** was created by transplanting plants into a nutrient-poor substrate  
299 (Huminsubstrat N3, Neuhaus, Germany) instead of the standard substrate used for all other

300 plants. (11) **Short intense heat** stress was created by moving plants for 24 h to a 37°C  
301 growth chamber at day 16 and then back to control conditions, whereas for the (12)  
302 **prolonged mild heat** treatment plants were moved to a 30°C growth chamber for 10 days,  
303 starting at day 16. For the combination of the two heat treatments, the plants were first moved  
304 to the 37° chamber for 24 h and then to the 30°C chamber for another nine days.

305

### 306 *Offspring phenotyping*

307 To test for the effects of parental stress treatments, or their combinations, on offspring  
308 phenotypes, we used the seeds collected from the parental generation to grow offspring of all  
309 genotypes and parental treatments in a common greenhouse environment. Using the same  
310 protocols for germination and growth and the same pots and substrate as for the parental  
311 generation, we grew 10 replicate plants per genotype and treatment (= a total of 24 x 3 x 10 =  
312 720 plants) in a greenhouse with a 16/8 h light/dark cycle and temperatures of 27/16°C  
313 (day/night). The plants were arranged in a fully randomized order and watered regularly. We  
314 measured the same phenotypic traits as in the parental generation: growth rate, aboveground  
315 biomass, flowering time, and fruit number.

316

### 317 *Statistical analyses*

318 The parental generation data were analysed through linear models in which we tested the  
319 effects of stress treatments, plant genotype, and their interactions, on the growth rate,  
320 aboveground biomass, fruit production and flowering time of plants. We carried out these  
321 analyses separately for each of the four locations.

322 For the offspring generation data, we first examined how large the differences between  
323 the four parental locations were, in spite of our efforts to standardize conditions. A two-way  
324 ANOVA testing for location and genotype effects among the control plants only showed that  
325 there were still large differences among locations ( $P < 0.001$  for all traits), and we therefore  
326 decided to also analyse the offspring data separately for each location. We used similar linear  
327 models as for the parental generation analyses, testing for the effects of parental treatment  
328 and genotype, and their interactions, in each location. If the main effect of parental treatments  
329 was significant, we additionally tested a series of contrasts comparing each treatment  
330 combination to the control group, to identify which specific parental treatments had  
331 significant effects on the offspring. We first ran these analyses across all genotypes and then,  
332 since genotype by treatment interactions were significant in most cases, also separately for  
333 each genotype.

334 To test for a relationship between the magnitude and direction of parental and offspring  
335 stress responses, we calculated the cross-genotype % change caused by each treatment when  
336 compared to the respective control plants. We did this for the parental and offspring data and  
337 then used linear regression to test for a relationship between the two.

338

### 339 **Acknowledgements**

340 This work, as part of the European Science Foundation EUROCORES Programme  
341 EuroEEFG, was funded by the Swiss National Science Foundation (SNF grant 31EE30-  
342 131171 to O.B. and M.F.), the German Research Foundation (DFG grant SCHM 1354/4-1 to  
343 K.S., the Austrian Science Fund (FWF I489 to Ortrun Mittelsten Scheid, and FWF I3687 to  
344 R.G.), and the Dutch Research Council NWO grant to J.O.). V.L. acknowledges support from  
345 the Czech Science Foundation 20-00871S and RVO 67985939. We are extremely grateful to  
346 Vincent Colot and Ortrun Mittelsten Scheid for their intellectual contributions to this study.

347

### 348 **References**

- 349 1. A. V. Badyaev, T. Uller, Parental effects in ecology and evolution: mechanisms, processes  
350 and implications. *Phil. Trans. R. Soc. B* **364**, 1169-1177 (2009).
- 351 2. J. J. Herman, S. E. Sultan, Adaptive transgenerational plasticity in plants: case studies,  
352 mechanisms, and implications for natural populations. *Front. Plant Sci.* **2**, 102, (2011).
- 353 3. J. Yin, M. Zhou, Z. Lin, Q. Q. Li, Y. Y. Zhang, Transgenerational effects benefit offspring  
354 across diverse environments: a meta-analysis in plants and animals. *Ecol. Lett.* **22**, 1976–  
355 1986 (2019).
- 356 4. E. Jablonka, G. Raz, Transgenerational epigenetic inheritance: prevalence, mechanisms,  
357 and implications for the study of heredity and evolution. *Q. Rev Biol.* **84**, 131–176 (2009).
- 358 5. C. L. Richards, C. Alonso, C. Becker, O. Bossdorf, E. Bucher, M. Colomé-Tatché, W.  
359 Durka, J. Engelhardt, B. Gaspar, A. Gogol-Döring, I. Grosse, T. P. van Gurp, K. Heer, I.  
360 Kronholm, C. Lampei, V. Latzel, M. Mirouze, L. Opgenoorth, O. Paun, S. J. Prohaska, S.  
361 A. Rensing, P. F. Stadler, E. Trucchi, K. Ullrich, K. J. F. Verhoeven, Ecological plant  
362 epigenetics: evidence from model and non-model species, and the way forward. *Ecol. Lett.*  
363 **20**, 1576–1590 (2017).
- 364 6. L. F. Galloway, J. R. Etterson, Transgenerational plasticity is adaptive in wild. *Science* **318**,  
365 1134 – 1136 (2007).
- 366 7. J. Colicchio, Transgenerational effects alter plant defence and resistance in nature. *J. Evol.*  
367 *Biol.* **30**, 664–680 (2017).

- 368 8. H. Baker, S. E. Sultan, M. Lopez-Ichikawa, R. Waterman, Transgenerational effects of  
369 parental light environment on progeny competitive performance and lifetime fitness. *Phil.*  
370 *Trans. R. Soc. B* **374**, 20180182 (2019).
- 371 9. M. Kirkpatrick, R. Lande, The evolution of maternal characters. *Evolution* **43**, 485–503  
372 (1989).
- 373 10. D. J. Marshall, T. Uller, When is a maternal effect adaptive? *Oikos* **116**, 1957–1963  
374 (2007).
- 375 11. K. Räsänen, L. E. B. Kruuk, Maternal effects and evolution at ecological time-scales.  
376 *Funct. Ecol.* **21**, 408–421 (2007).
- 377 12. A. V. Badyaev, Evolutionary significance of phenotypic accommodation in novel  
378 environments: an empirical test of the Baldwin effect. *Phil. Trans. R. Soc. B* **364**, 1125–  
379 1141(2009).
- 380 13. R. Bonduriansky, T. Day, Nongenetic inheritance and its evolutionary implications. *Annu.*  
381 *Rev. Ecol. Evol. Syst.* **40**, 103–125 (2009).
- 382 14. C. A. Whittle, S. P. Otto, M. O. Johnston, J. E. Krochko, Adaptive epigenetic memory of  
383 ancestral temperature regime in *Arabidopsis thaliana*. *Botany* **87**, 650–657 (2009).
- 384 15. V. Latzel, Š. Janeček, J. Doležal, J. Klimešová, O. Bossdorf, Adaptive transgenerational  
385 plasticity in the perennial *Plantago lanceolata*. *Oikos* **123**, 41–46 (2014).
- 386 16. R. A. P. González, V. Dumalasová, J. Rosenthal, J. Skuhrovec, V. Latzel, The role of  
387 transgenerational effects in adaptation of clonal offspring of white clover (*Trifolium*  
388 *repens*) to drought and herbivory. *Evol. Ecol.* **31**, 345–361 (2017).
- 389 17. C. Lampei, Multiple simultaneous treatments change plant response from adaptive  
390 parental effects to within-generation plasticity, in *Arabidopsis thaliana*. *Oikos* **128**, 368–  
391 379 (2019).
- 392 18. J. Puy, F. de Bello, H. Dvořáková, N. G. Medina, V. Latzel, C. P. Carmona, Competition-  
393 induced transgenerational plasticity influences competitive interactions and leaf  
394 decomposition of offspring. *New Phytol.* **229**, 3497–3507 (2021).
- 395 19. A. R. Dyer, C. S. Brown, E. K. Espeland, J. K. McKay, H. M. Meimberg, K. J. Rice, The  
396 role of adaptive trans-generational plasticity in biological invasions of plants. *Evol. Appl.*  
397 **3**, 179–192 (2010).
- 398 20. S. C. Burgess, D. J. Marshall, Temperature-induced maternal effects and environmental  
399 predictability. *J. Exp. Biol.* **214**, 2329–2336 (2011).
- 400 21. BR. Bonduriansky, A. J. Crean, T. Day, The implications of nongenetic inheritance for  
401 evolution in changing environments. *Evol. Appl.* **5**, 192–201 (2012).

- 402 22. K. N. Laland, T. Uller, M. W. Feldman, K. Sterelny, G. B. Müller, A. Moczek, E.  
403 Jablonka, J. Odling-Smee, The extended evolutionary synthesis: its structure, assumptions  
404 and predictions. *Proc. R. Soc. B* **282**, 20151019 (2015).
- 405 23. V. Latzel, T. Hájek, J. Klimešová, S. Gómez, Nutrients and disturbance history in two  
406 *Plantago* species: maternal effects as a clue for observed dichotomy between resprouting  
407 and seeding strategies. *Oikos* **118**, 1669–1678 (2009).
- 408 24. V. Latzel, T. Hájek, J. Klimešová, S. Gómez, P. Šmilauer, Maternal effects alter progeny's  
409 response to disturbance and nutrients in two *Plantago* species. *Oikos* **119**, 1700–1710  
410 (2010).
- 411 25. S. E. Sultan, K. Barton, A. M. Wilczek, Contrasting patterns of transgenerational  
412 plasticity in ecologically distinct congeners. *Ecology* **90**, 1831 – 1839 (2009).
- 413 26. J. Kochanek, K. J. Steadman, R. J. Probert, S. W. Adkins, Parental effects modulate seed  
414 longevity: exploring parental and offspring phenotypes to elucidate pre-zygotic  
415 environmental influences. *New Phytol.* **191**, 223–233 (2013).
- 416 27. L. Suter, A. Widmer, Phenotypic effects of salt and heat stress over three generations in  
417 *Arabidopsis thaliana*. *PLoS ONE* **8**, e80819 (2013a).
- 418 28. L. Suter, A. Widmer, Environmental heat and salt stress induce transgenerational  
419 phenotypic changes in *Arabidopsis thaliana*. *PloS ONE* **8**, e60364 (2013b).
- 420 29. M. P. Groot, A. Kubisch, N. J. Ouborg, J. Pagel, K. J. Schmid, P. Vergeer, C. Lampei,  
421 Transgenerational effects of mild heat in *Arabidopsis thaliana* show strong genotype  
422 specificity that is explained by climate at origin. *New Phytol.* **215**, 1221–1234 (2017).
- 423 30. O. Bossdorf, Z. Shuja, J. A. Banta, Genotype and maternal environment affect  
424 belowground interactions between *Arabidopsis thaliana* and its competitors. *Oikos* **118**,  
425 1541–1551(2009).
- 426 31. H. He, D. de Souza Vidigal, L. B. Snoek, S. Schnabel, H. Nijveen, H. Hilhorst, L.  
427 Bentsink Interaction between parental environment and genotype affects plant and seed  
428 performance in *Arabidopsis*. *J. Exp. Bot.* **65**, 6603–6615 (2014).
- 429 32. W. T. Vu, P. L. Chang, K. S. Moriuchi, M. L. Friesen, Genetic variation of  
430 transgenerational plasticity of offspring germination in response to salinity stress and the  
431 seed transcriptome of *Medicago truncatula*. *BMC Evol. Biol.* **15**, 59 (2015).
- 432 33. R. A. P. González, V. Preite, K. J. F. Verhoeven, V. Latzel, Transgenerational effects and  
433 epigenetic memory in the clonal plant *Trifolium repens*. *Front. Plant Sci.* **9**, 1677 (2018).
- 434 34. J. Tylianakis, R. K. Didham, J. Bascompte, D. A. Wardle, Global change and species  
435 interactions in terrestrial ecosystems. *Ecol. Lett.* **11**, 1351–1363 (2008).

- 436 35. Ü. Niinemets, Responses of forest trees to single and multiple environmental stresses  
437 from seedlings to mature plants: past stress history, stress interactions, tolerance and  
438 acclimation. *Forest Ecol. Manage.* **260**, 1623–1639 (2010).
- 439 36. C. Hof, M. B. Araujo, W. Jetz, C. Rahbek, Additive threats from pathogens, climate and  
440 land-use change for global amphibian diversity. *Nature* **480**, 516–519 (2011).
- 441 37. IPCC 2021. Masson-Delmotte, V., P. Zhai, A. Pirani, S.L. Connors, C. Péan, S. Berger, N.  
442 Caud, Y. Chen, L. Goldfarb, M.I. Gomis, M. Huang, K. Leitzell, E. Lonnoy, J.B.R.  
443 Matthews, T.K. Maycock, T. Waterfield, O. Yelekçi, R. Yu, and B. Zhou (eds.). Climate  
444 Change: The Physical Science Basis. Contribution of Working Group I to the Sixth  
445 Assessment Report of the Intergovernmental Panel on Climate Change. *Cambridge*  
446 *University Press* (2021).
- 447 38. M. R. Shaw, E. S. Zavaleta, N. R. Chiariello, E. E. Cleland, H. A. Mooney, C. B. Field,  
448 Grassland responses to global environmental changes suppressed by elevated CO<sub>2</sub>.  
449 *Science* **298**, 1987–1990 (2002).
- 450 39. N. T. Shears, P. M. Ross, Toxic cascades: multiple anthropogenic stressors have complex  
451 and unanticipated interactive effects on temperate reefs. *Ecol. Lett.* **13**, 1149–1159 (2010).
- 452 40. S. Rasmussen, P. J. Barah, M. C. Suarez-Rodriguez, S. Bressendorff, P. Friis, P.  
453 Costantino, A. M. Bones, H. B. Nielsen, J. Mund, Transcriptome responses to  
454 combinations of stresses in *Arabidopsis*. *Plant Physiol.* **161**, 1783–1794 (2013).
- 455 41. H. Zhang, U. Sonnewald, Differences and commonalities of plant responses to single and  
456 combined stresses. *Plant J.* **90**, 839–855 (2017).
- 457 42. S. I. Zandalinas, F. B. Fritschi, R. Mittler, Global warming, climate change, and  
458 environmental pollution: recipe for a multifactorial stress combination disaster. *Trends*  
459 *Plant Sci.* **26**: 6 (2021).
- 460 43. J. A. Lau, J. Peiffer, P. B. Reich, P. Tiffin, Transgenerational effects of global  
461 environmental change: long-term CO<sub>2</sub> and nitrogen treatments influence offspring growth  
462 response to elevated CO<sub>2</sub>. *Oecologia* **158**, 141–150 (2008).
- 463 44. Z. Münzbergová, V. Hadincová, Transgenerational plasticity as an important mechanism  
464 affecting response of clonal species to changing climate. *Ecol. Evol.* **7**, 5236–5247  
465 (2017).
- 466 45. C. Andalo, C. Raquin, N. Machon, B. Godelle, M. Mousseau, Direct and maternal effects  
467 of elevated CO<sub>2</sub> on early root growth of germinating *Arabidopsis thaliana* seedlings. *Ann.*  
468 *Bot.* **81**, 405–411(1998).

- 469 46. A. V. Badyaev, Maternal effects as generators of evolutionary change: a reassessment.  
470 *Ann. N Y Acad. Sci.* **1133**, 151–161 (2008).
- 471 47. J. R. Stinchcombe, A. L. Caicedo, R. Hopkins, C. Mays, E. W. Boyd, M. D. Purugganan,  
472 J. Schmitt, Vernalization sensitivity in *Arabidopsis thaliana* (Brassicaceae): The effects of  
473 latitude and FLC variation. *Am. J. Bot.* **92**, 1701–1707 (2005).
- 474 48. S. Andalo, S. J. Mazer, B. Godelle, N. Machon, Parental environmental effects on life  
475 history traits in *Arabidopsis thaliana* (Brassicaceae). *New Phytol.* **142**, 173–184 (1999).
- 476 49. A. A. Agrawal, Transgenerational consequences of plant responses to herbivory: an  
477 adaptive maternal effect? *Am. Nat.* **157**, 555–569 (2001).
- 478 50. A. A. Agrawal, Herbivory and maternal effects: Mechanisms and consequences of  
479 transgenerational induced plant resistance. *Ecology* **83**: 3408–3415 (2002).
- 480 51. L. F. Galloway, The effect of maternal and paternal environments on seed characters in  
481 the herbaceous plant *Campanula americana*. *Am. J. Bot.* **88**, 832–840 (2001).
- 482 52. C. Riginos, M. S. Heschel, J. Schmitt, Maternal effects of drought stress and inbreeding  
483 in *Impatiens capensis* (Balsaminaceae). *Am. J. Bot.* **94**, 1984–1991 (2007).
- 484 53. S. E. Sultan, Phenotypic plasticity for plant development, function and life history. *Trends*  
485 *Plant Sci.* **5**, 537–542 (2000).
- 486 54. M. Pigliucci, C. J. Murren, C. D. Schlichting, Phenotypic plasticity and evolution by  
487 genetic assimilation. *J. Exp. Biol.* **209**, 2362–2367 (2006).
- 488 55. L. M. Chevin, R. Lande, G. M. Mace, Adaptation, plasticity, and extinction in a changing  
489 environment: towards a predictive theory. *PLoS Biol.* **8**, e1000357 (2010).
- 490 56. A. B. Nicotra, O. K. Atkin, S. P. Bonser, A. M. Davidson, E. J. Finnegan, U. Mathesius, P.  
491 Poot, M. D. Purugganan, C. L. Richards, F. Valladares, M. van Kleunen, Plant phenotypic  
492 plasticity in a changing climate. *Trends Plant Sci.* **15**, 1360–1385 (2010).
- 493 57. A. A. Hoffmann, C. M. Sgrò, Climate change and evolutionary adaptation. *Nature* **470**,  
494 479–485 (2011).
- 495 58. A. S. Jump, J. Penuelas, Running to stand still: adaptation and the response of plants to  
496 rapid climate change. *Ecol. Lett.* **8**, 1010–1020 (2005).
- 497 59. D. W. Meinke, J. M. Cherry, C. Dean, S. D. Rounsley, M. Koornneef, *Arabidopsis*  
498 *thaliana*: A model plant for genome analysis. *Science* **282**, 662–682 (1998).
- 499 60. M. Pigliucci, Ecology and evolutionary biology of *Arabidopsis*. The Arabidopsis book.  
500 *Am. Soc. Plant Biol.* **1**, e0003 (2002).
- 501

502 **Figure 1.** Effect sizes of parental effects of different environmental stresses, or their  
503 combinations, on *Arabidopsis thaliana* plants. The values are % differences (mean  $\pm$  SE) in  
504 performance between the offspring of treated parents and the offspring of control parents.  
505 Note that the parental generation was grown in four different experimental locations. The  
506 coloured squares indicate the significance levels (from contrasts) of parental effects for  
507 individual genotypes (red spectrum = negative effects; blue spectrum = positive effects).

508

509 **Figure 2.** Relation of offspring biomass production responses to parental treatments with  
510 responses of parents to the treatments. The responses are % changes in biomass production of  
511 plants experiencing treatment (or offspring of parents of the treatments) in comparison to  
512 control plants (or offspring of control parents). Individual treatments are highlighted.

513



**Table 1.** Results of ANOVA testing for parental effects of individual stresses, or their combinations, on the growth and fitness of three genotypes of *Arabidopsis thaliana*. Since the parental generation was grown in four different locations, the data were analysed separately for each. Effects significant at  $P < 0.05$  are highlighted.

|                  | D.f.               | Biomass |        | Growth rate |        | No. of fruits |          | Flowering time |          |        |
|------------------|--------------------|---------|--------|-------------|--------|---------------|----------|----------------|----------|--------|
|                  |                    | F       | Pr(>F) | F           | Pr(>F) | Dev.          | Pr(>Chi) | Dev.           | Pr(>Chi) |        |
| <b>Bern</b>      | Light (L)          | 1       | 0.1    | 0.789       | 0.3    | 0.570         | 17       | 0.481          | 0.322    | 0.370  |
|                  | Metal (M)          | 1       | 11.3   | 0.001       | 4.5    | 0.035         | 453      | <0.001         | 0.028    | 0.791  |
|                  | Pathogen (P)       | 1       | 1.0    | 0.326       | 0.0    | 0.986         | 2        | 0.797          | 3.47     | 0.003  |
|                  | Ecotype            | 2       | 1.6    | 0.211       | 6.8    | 0.001         | 424      | 0.002          | 31.25    | <0.001 |
|                  | L : M              | 1       | 0.4    | 0.518       | 0.7    | 0.390         | 1        | 0.884          | 0.61     | 0.217  |
|                  | L : P              | 1       | 24.3   | <0.001      | 1.5    | 0.228         | 507      | <0.001         | 0.377    | 0.332  |
|                  | M : P              | 1       | 0.4    | 0.533       | 0.1    | 0.760         | 26       | 0.388          | 0.064    | 0.690  |
|                  | L : Ecotype        | 2       | 1.1    | 0.324       | 1.0    | 0.372         | 201      | 0.056          | 5.736    | 0.001  |
|                  | M : Ecotype        | 2       | 12.7   | <0.001      | 0.5    | 0.632         | 628      | <0.001         | 0.638    | 0.451  |
|                  | P : Ecotype        | 2       | 2.7    | 0.073       | 0.5    | 0.635         | 255      | 0.026          | 0.666    | 0.436  |
|                  | L : M : Ecotype    | 2       | 1.0    | 0.365       | 0.4    | 0.665         | 115      | 0.192          | 3.293    | 0.016  |
|                  | L : P : Ecotype    | 2       | 2.2    | 0.117       | 0.2    | 0.813         | 103      | 0.226          | 0.396    | 0.610  |
|                  | M : P : Ecotype    | 2       | 1.0    | 0.386       | 1.4    | 0.244         | 34       | 0.609          | 0.129    | 0.852  |
|                  | Residuals          | 176     |        |             |        |               | 8846     |                | 108.5    |        |
| <b>Hohenheim</b> | Clipping (C)       | 1       | 28.4   | <0.001      | 1.5    | 0.219         | 641      | <0.001         | 0.693    | 0.234  |
|                  | Low Temp. (T)      | 1       | 0.6    | 0.428       | 0.2    | 0.620         | 2        | 0.850          | 0.032    | 0.798  |
|                  | Shade (S)          | 1       | 7.7    | 0.006       | 0.7    | 0.417         | 355      | 0.007          | 0.534    | 0.296  |
|                  | Ecotype            | 2       | 8.5    | <0.001      | 2.6    | 0.081         | 269      | 0.062          | 50.6     | <0.001 |
|                  | C : T              | 1       | 0.1    | 0.741       | 0.6    | 0.441         | 24       | 0.478          | 0.048    | 0.754  |
|                  | C : S              | 1       | 0.4    | 0.520       | 1.5    | 0.227         | 12       | 0.616          | 0.973    | 0.159  |
|                  | T : S              | 1       | 37.5   | <0.001      | 1.1    | 0.286         | 1281     | <0.001         | 0.246    | 0.478  |
|                  | C : Ecotype        | 2       | 31.3   | <0.001      | 0.4    | 0.658         | 1334     | <0.001         | 0.346    | 0.702  |
|                  | C : Ecotype        | 2       | 1.9    | 0.151       | 0.1    | 0.870         | 72       | 0.476          | 0.613    | 0.535  |
|                  | S : Ecotype        | 2       | 12.3   | <0.001      | 0.2    | 0.839         | 649      | 0.001          | 3.542    | 0.027  |
|                  | C : T : Ecotype    | 2       | 0.1    | 0.949       | 1.8    | 0.162         | 32       | 0.719          | 0.307    | 0.731  |
|                  | C : S : Ecotype    | 2       | 0.4    | 0.641       | 1.1    | 0.350         | 23       | 0.791          | 2.981    | 0.048  |
|                  | T : S : Ecotype    | 2       | 0.3    | 0.767       | 0.7    | 0.483         | 119      | 0.291          | 0.436    | 0.640  |
|                  | Residuals          | 197     |        |             |        |               | 14670    |                | 145.5    |        |
| <b>Nijmegen</b>  | Drought (D)        | 1       | 4.1    | 0.045       | 6.1    | 0.015         | 42       | 0.360          | 1.826    | 0.177  |
|                  | Jasmonic acid (Ja) | 1       | 21.3   | <0.001      | 6.0    | 0.015         | 618      | <0.001         | 0.438    | 0.508  |
|                  | Salt (S)           | 1       | 5.0    | 0.027       | 0.1    | 0.750         | 178      | 0.061          | 0.224    | 0.636  |
|                  | Ecotype            | 2       | 26.7   | <0.001      | 0.7    | 0.494         | 1758     | <0.001         | 38.47    | <0.001 |
|                  | D : Ja             | 1       | 5.8    | 0.017       | 0.4    | 0.523         | 155      | 0.080          | 0.81     | 0.368  |
|                  | D : S              | 1       | 27.3   | <0.001      | 0.1    | 0.814         | 925      | <0.001         | 0.714    | 0.398  |
|                  | Ja : S             | 1       | 5.3    | 0.023       | 0.8    | 0.359         | 150      | 0.085          | 0.177    | 0.674  |
|                  | D : Ecotype        | 2       | 7.3    | 0.001       | 2.9    | 0.057         | 444      | 0.012          | 1.396    | 0.498  |
|                  | Ja : Ecotype       | 2       | 8.5    | <0.001      | 0.8    | 0.444         | 271      | 0.069          | 3.796    | 0.150  |
|                  | S : Ecotype        | 2       | 1.6    | 0.205       | 1.6    | 0.197         | 166      | 0.195          | 1.294    | 0.524  |
|                  | D : Ja : Ecotype   | 2       | 9.7    | <0.001      | 0.2    | 0.844         | 658      | 0.002          | 4.143    | 0.126  |
|                  | D : S : Ecotype    | 2       | 11.0   | <0.001      | 1.0    | 0.371         | 1289     | <0.001         | 0.641    | 0.726  |
|                  | Ja : S : Ecotype   | 2       | 2.8    | 0.061       | 1.1    | 0.333         | 151      | 0.225          | 2.619    | 0.270  |
|                  | Residuals          | 175     |        |             |        |               | 15841    |                | 127.1    |        |
| <b>Vienna</b>    | LowN (N)           | 1       | 2.8    | 0.094       | 1.4    | 0.233         | 64       | 0.212          | 0.095    | 0.648  |
|                  | Long Heat (Lh)     | 1       | 0.0    | 0.848       | 2.3    | 0.132         | 0        | 0.926          | 0.543    | 0.275  |
|                  | Short heat (Sh)    | 1       | 13.6   | <0.001      | 0.7    | 0.394         | 384      | 0.002          | 0.069    | 0.698  |
|                  | Ecotype            | 2       | 22.1   | <0.001      | 1.8    | 0.163         | 1010     | <0.001         | 58.65    | <0.001 |
|                  | N : Lh             | 1       | 9.3    | 0.003       | 0.3    | 0.571         | 188      | 0.033          | 0.272    | 0.440  |
|                  | N : Sh             | 1       | 23.6   | <0.001      | 0.1    | 0.748         | 281      | 0.009          | 0.787    | 0.189  |
|                  | Lh : Sh            | 1       | 5.8    | 0.017       | 0.4    | 0.510         | 85       | 0.153          | 2.309    | 0.024  |
|                  | N : Ecotype        | 2       | 0.9    | 0.416       | 0.1    | 0.917         | 134      | 0.198          | 2.475    | 0.066  |
|                  | Lh : Ecotype       | 2       | 6.3    | 0.002       | 1.0    | 0.388         | 455      | 0.004          | 3.844    | 0.015  |
|                  | Sh : Ecotype       | 2       | 4.4    | 0.014       | 0.5    | 0.589         | 224      | 0.067          | 1.339    | 0.231  |
|                  | N : Lh : Ecotype   | 2       | 0.6    | 0.533       | 0.6    | 0.555         | 10       | 0.888          | 0.448    | 0.612  |
|                  | N : Sh : Ecotype   | 2       | 9.3    | <0.001      | 0.3    | 0.760         | 299      | 0.027          | 0.257    | 0.754  |
|                  | Lh : Sh : Ecotype  | 2       | 2.6    | 0.078       | 0.7    | 0.485         | 344      | 0.016          | 0.268    | 0.745  |
|                  | Residuals          | 194     |        |             |        |               | 12337    |                | 148.7    |        |

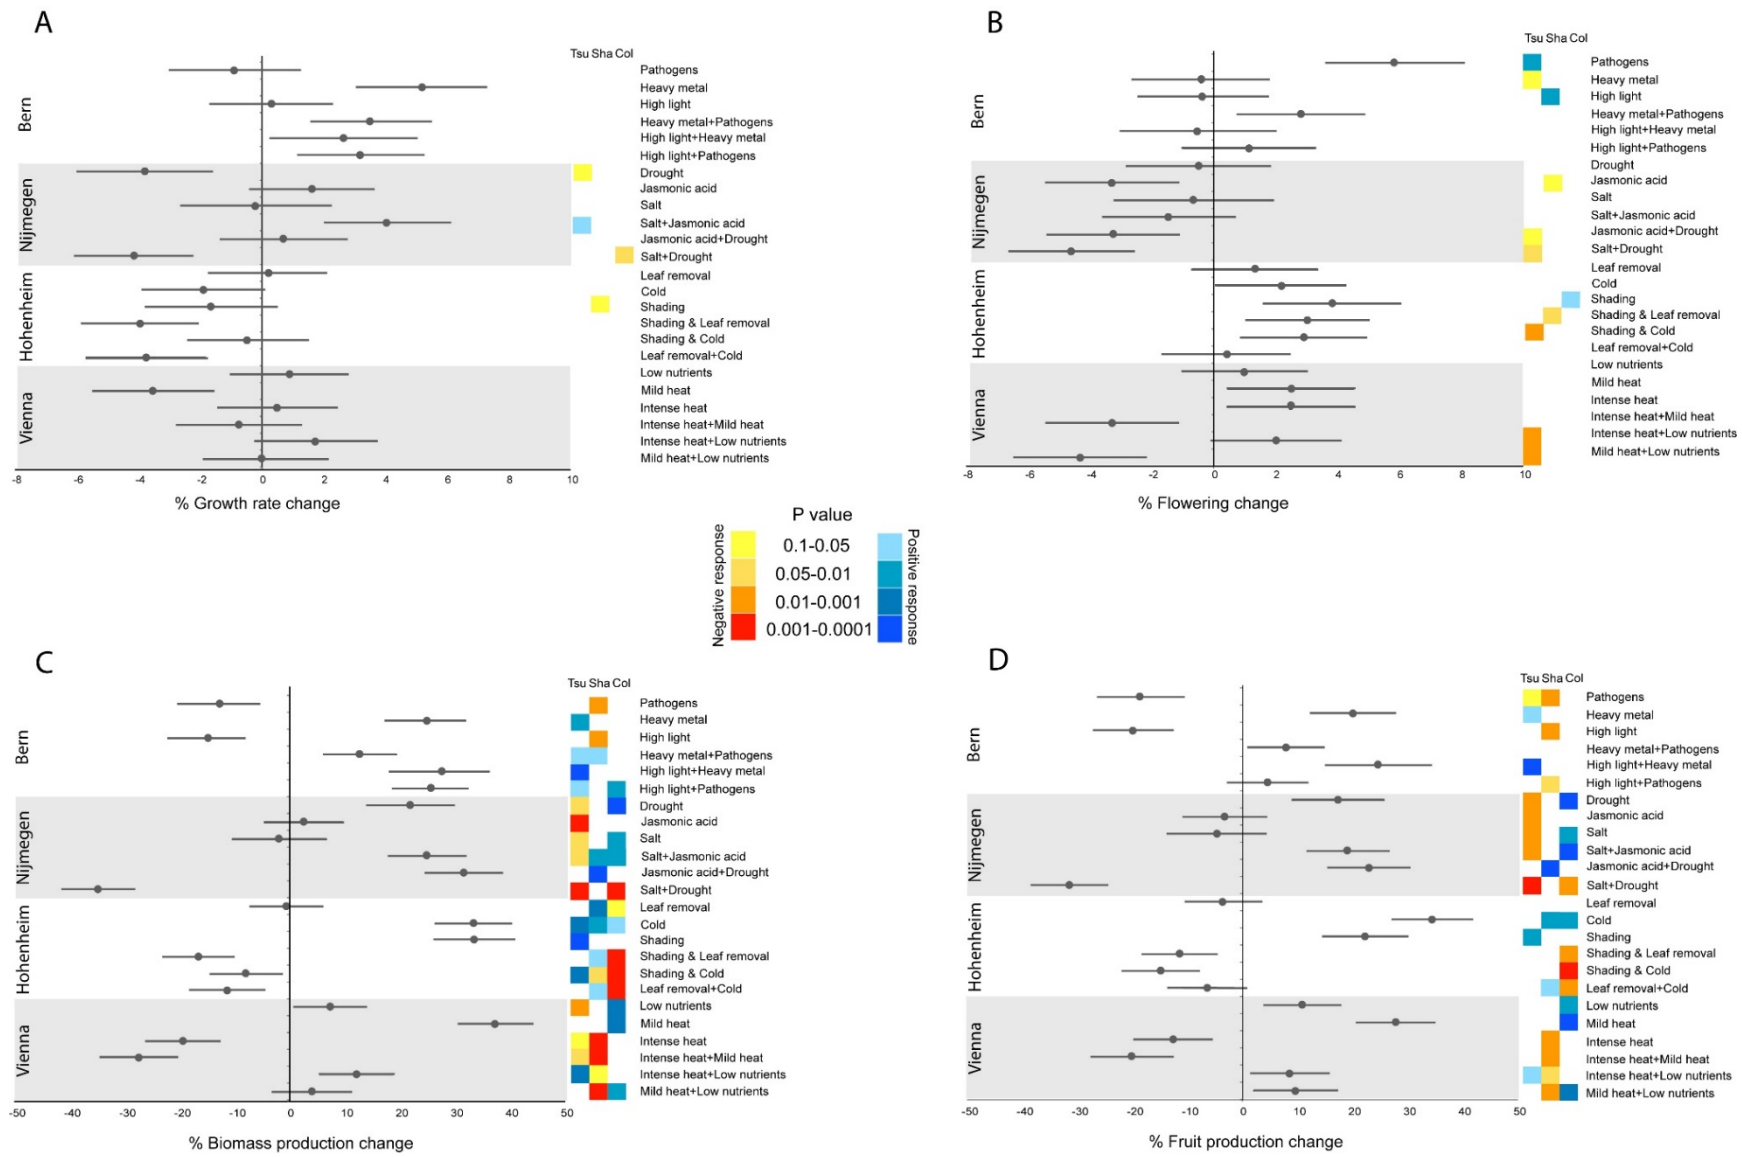

Figure 1

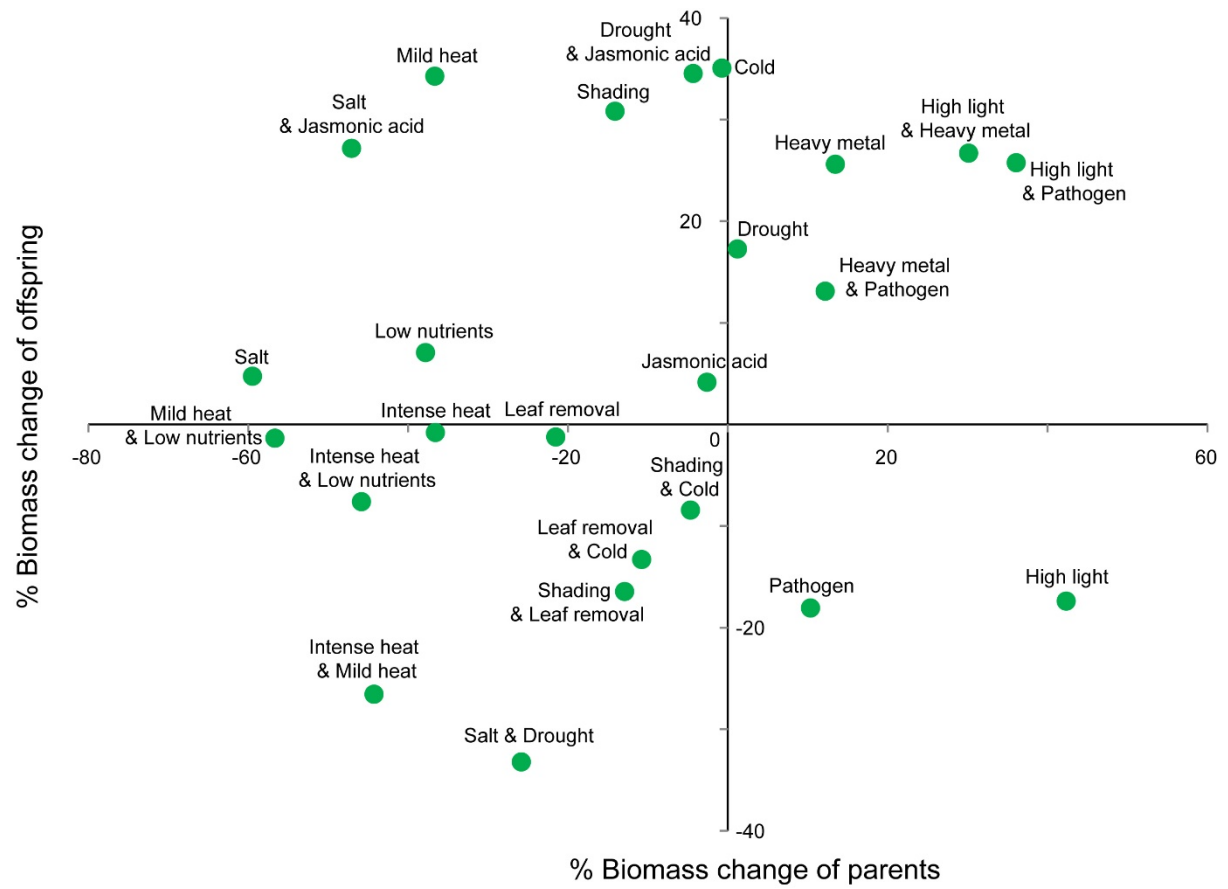

Figure 2
